# Supplementary material for: Patient-reported outcome measures after periodontal surgery
Source: Springer Nature journal article supplement (doi:10.1007/s00784-023-05362-y), 2023-11-09
Supplement: MOESM1 [file 784_2023_5362_MOESM1_ESM.pdf]

| Sub-domains of OHIP-14 scale        | Resective periodontal surgery | Regenerative periodontal surgery | Muco-gingival periodontal surgery | TOTAL    |
|-------------------------------------|-------------------------------|----------------------------------|-----------------------------------|----------|
| 1-Functional limitation (Q1-Q2)     | 1.3±1.7                       | 0.75±1.3                         | 1.41±1.6                          | 1.26±1.6 |
| 2-Physical pain (Q3-Q4)             | 2.58±1.9                      | 2.46±1.8                         | 2.6±2.1                           | 2.58±1.9 |
| 3-Psychological discomfort (Q5-Q6)  | 0.95±1.5                      | 0.64±1.2                         | 1.44±1.8                          | 1.17±1.7 |
| 4-Physical disability (Q7-Q8)       | 1.48±1.76                     | 1.14±1.4                         | 1.79±1.8                          | 1.59±1.7 |
| 5-Psychological disability (Q9-Q10) | 0.77±1.31                     | 0.61±1.03                        | 1.15±1.34                         | 0.95±1.3 |
| 6-Social disability (Q11-Q12)       | 0.85±1.2                      | 1.07±1.5                         | 1.26±1.6                          | 1.12±1.5 |
| 7-Handicap (Q13-14)                 | 0.83±1.3                      | 1.1±1.5                          | 1.4±1.7                           | 1.2±1.6  |
| OHIP-14 total score                 | 8.75±8.3                      | 7.78±7.1                         | 11.06±8.9                         | 9.87±8.5 |

Table S1: OHIP-14 scale and subdomains mean values

| Groups                                       |                  | N of cases (%) | VAS      | Coefficient | 95%CI           | P value |
|----------------------------------------------|------------------|----------------|----------|-------------|-----------------|---------|
| <b>Demographic characteristics</b>           |                  |                |          |             |                 |         |
| Sex                                          | Male             | 41 (26.5%)     | 2.99±2.5 | 0.329       | (-0.399; 1.058) | 0.376   |
|                                              | Female           | 114 (73.5%)    | 2.87±2.2 |             |                 |         |
| Age                                          | <50              | 102 (65.8%)    | 2.85±2.6 | -0.009      | (-0.033; 0.013) | 0.399   |
|                                              | >50              | 53 (34.2%)     | 2.99±2.3 |             |                 |         |
| Employment                                   | Public employee  | 91 (58.7%)     | 2.94±2.4 | 0.15        | (-0.154; 0.454) | 0.335   |
|                                              | Private employee | 33 (21.3%)     | 3.04±2.5 |             |                 |         |
|                                              | Retired          | 17 (10.9%)     | 3.05±2.5 |             |                 |         |
|                                              | student          | 13 (8.4%)      | 2.45±2.2 |             |                 |         |
|                                              | unemployed       | 1 (0.6%)       | 3.16±1.9 |             |                 |         |
| Smoke                                        | No               | 132 (85.2%)    | 3.17±2.6 | 0.043       | (-0.834; 0.92)  | 0.924   |
|                                              | Yes              | 23 (14.8%)     | 5        |             |                 |         |
| <b>Clinical and surgical characteristics</b> |                  |                |          |             |                 |         |
| Periodontal surgical treatment               | Resective        | 40 (25.8%)     | 3.7±2.9  | -0.057      | (-0.820; 0.706) | 0.883   |
|                                              | Regenerative     | 28 (18.1%)     | 2.9±2.4  |             |                 |         |

|                                 |               |             |          |        |                 |       |
|---------------------------------|---------------|-------------|----------|--------|-----------------|-------|
|                                 | Muco-gingival | 87 (56.1%)  | 2.6±2    |        |                 |       |
| S u r g e o n<br>experience     | Expert        | 137 (88.4%) | 2.83±2.3 | 0.643  | (-0.449; 1.734) | 0.249 |
|                                 | resident      | 18 (11.6%)  | 3.94±2.8 |        |                 |       |
| Duration of<br>surgery          | <60           | 67 (43.2%)  | 2.67±2.2 | 0.233  | (-0.25; 0.715)  | 0.345 |
|                                 | >60 <120      | 69 (44.5%)  | 3.01±2.4 |        |                 |       |
|                                 | >120          | 19 (12.3%)  | 3.76±2.8 |        |                 |       |
| N° of surgical<br>assistants    | One           | 48 (31%)    | 3.08±2.7 | 0.15   | (-0.299; 0.599) | 0.513 |
|                                 | Two           | 64 (41.3%)  | 3.02±2.2 |        |                 |       |
|                                 | Three or more | 43 (27.7%)  | 2.72±2.4 |        |                 |       |
| I n t r a - o r a l<br>pictures | No            | 42 (27.1%)  | 3.35±2.7 | -0.214 | (-1.127; 0.698) | 0.645 |
|                                 | yes           | 113 (72.9%) | 2.81±2.3 |        |                 |       |
| Arch location                   | Maxilla       | 77 (49.7%)  | 2.93±2.6 | 0.235  | (-0.361; 0.831) | 0.439 |
|                                 | mandible      | 78 (50.3%)  | 2.98±2.2 |        |                 |       |
| Site location                   | Anterior      | 43 (27.7%)  | 2.71±1.9 | -0.48  | (-1.069; 0.109) | 0.110 |
|                                 | Posterior     | 78 (50.3%)  | 3.05±2.7 |        |                 |       |
|                                 | both          | 34 (22%)    | 3.06±2.3 |        |                 |       |
| N° of teeth<br>involved         | Singular      | 54 (34.8%)  | 2.55±2.2 | 0.434  | (-0.271; 1.14)  | 0.228 |
|                                 | multiple      | 101 (65.2%) | 3.17±2.5 |        |                 |       |
| Palatine flap                   | No            | 93 (60%)    | 2.55±1.9 | 1.467  | (-0.285; 3.219) | 0.101 |
|                                 | Yes           | 62 (40%)    | 3.57±2.8 |        |                 |       |
| Flap extension                  | <3 teeth      | 94 (60.6%)  | 2.85±2.4 | 0.27   | (-0.421; 0.961) | 0.444 |
|                                 | > 3 teeth     | 61(39.4%)   | 3.12±2.3 |        |                 |       |
| V e r t i c a l<br>releasing    | No            | 63 (40.6%)  | 2.83±2.5 | 0.812  | (0.0833; 1.541) | 0.029 |
|                                 | yes           | 92 (59.4%)  | 3.03±2.3 |        |                 |       |
| Palatine graft                  | No            | 71 (45.8%)  | 3.3±2.7  | 1.467  | (-0.285; 3.219) | 0.101 |
|                                 | Yes           | 84 (54.2%)  | 2.67±2.1 |        |                 |       |
| Periodontal<br>dressing         | No            | 93 (60%)    | 3.18±2.6 | 0.088  | (-0.835; 1.011) | 0.852 |
|                                 | yes           | 62 (40%)    | 2.62±1.9 |        |                 |       |
| <b>Drug consumption</b>         |               |             |          |        |                 |       |
| A n t i b i o t i c<br>therapy  | No            | 46 (29.7%)  | 3.43±2.5 | -0.284 | (-0.966; 0.398) | 0.415 |
|                                 | yes           | 109 (70.3%) | 2.76±2.3 |        |                 |       |
| N S A I D<br>therapy            | NSAID         | 140 (90.3%) | 3.04±2.4 |        |                 |       |

|  |                                |           |         |        |                 |       |
|--|--------------------------------|-----------|---------|--------|-----------------|-------|
|  | NSAID + corticosteroid therapy | 12 (9.7%) | 2.2±1.8 | -0.673 | (-1.883; 0.537) | 0.276 |
|--|--------------------------------|-----------|---------|--------|-----------------|-------|

Table S2: multilevel mixed logistic regression exploring factors associated with VAS score

| <b>Groups</b>             | <b>Coefficient</b> | <b>95%CI</b>    | <b>P value</b> |
|---------------------------|--------------------|-----------------|----------------|
| Presence of Palatine flap | 0.802              | (0.1672; 1.437) | 0.013          |
| Vertical releasing        | 1.074              | (-0.068; 2.092) | 0.04           |

Table S3: multiple linear logistic regression after stepwise selection for factors associated with higher VAS score
